# Supplementary material for: Benzene and 2-ethyl-phthalate induce proliferation in normal rat pituitary cells
Source: PubMed Central journal article supplement (PMC5427103; doi:10.1007/s11102-016-0777-3), 2016-11-16
Supplement: 11102_2016_777_MOESM1_ESM.pdf [file 11102_2016_777_MOESM1_ESM.pdf]

**Supplemental Table 1- Primers for *AIP* and *AhR* qRT-PCR**

| Primers                                |           | Sequences (5'-3')          |
|----------------------------------------|-----------|----------------------------|
| <i>AIP</i>                             | sense     | TCGTGCGTACCATGCGTGAG       |
|                                        | antisense | TGTTGCGGAGGCTCTTGGC        |
| <i>AhR</i>                             | sense     | ACCAGTGTAGAGCACAAGTCAGAG   |
|                                        | antisense | AGACGCATAGAAGACCAAGGCATC   |
| <i><math>\beta</math>ACT</i>           | sense     | CCACACCCGCCACCAGTTC        |
|                                        | antisense | GACCCATACCCACCATCACACC     |
| <i><math>\beta</math>microglobulin</i> | sense     | TCTTTCTGGTGCTTGTCTCTCTGG   |
|                                        | antisense | CTATCTGAGGTGGGTGGAAGTCTGAG |
| <i>L13A</i>                            | sense     | AGGTGGTGGTTGTACGCTGTG      |
|                                        | antisense | GGTTGGTGTTTCATCCGCTTTCG    |
