# Supplementary material for: Benzene and 2-ethyl-phthalate induce proliferation in normal rat pituitary cells
Source: Springer Nature journal article supplement (doi:10.1007/s11102-016-0777-3), 2016-11-16
Supplement: MOESM2 [file 11053596]

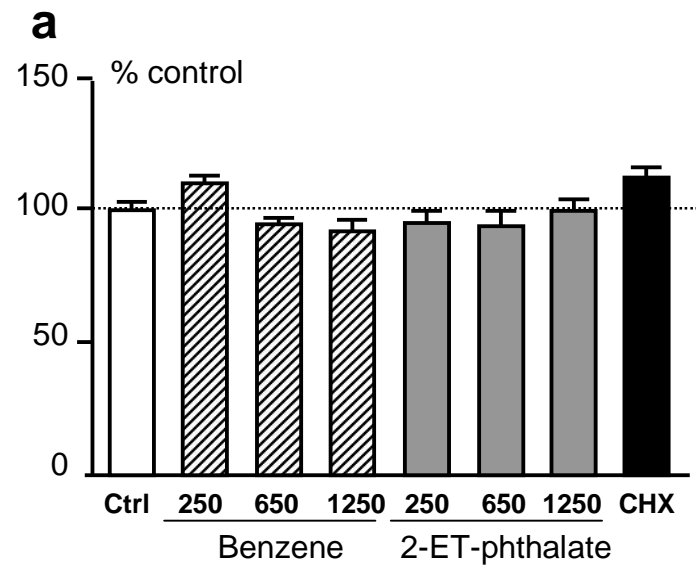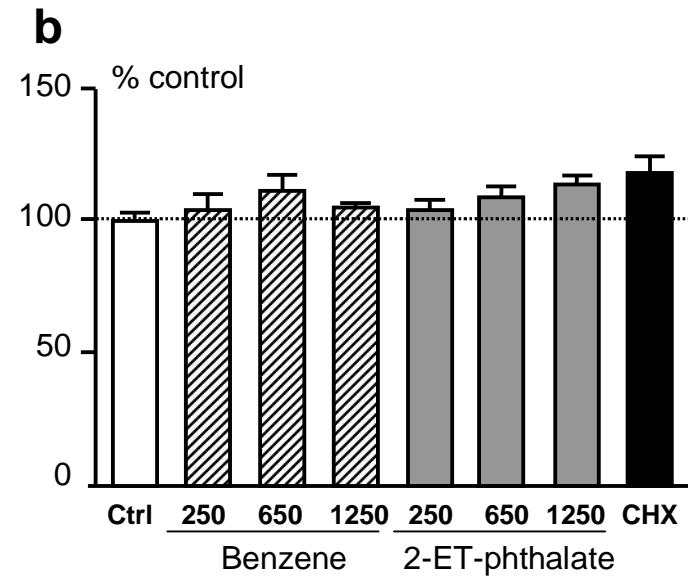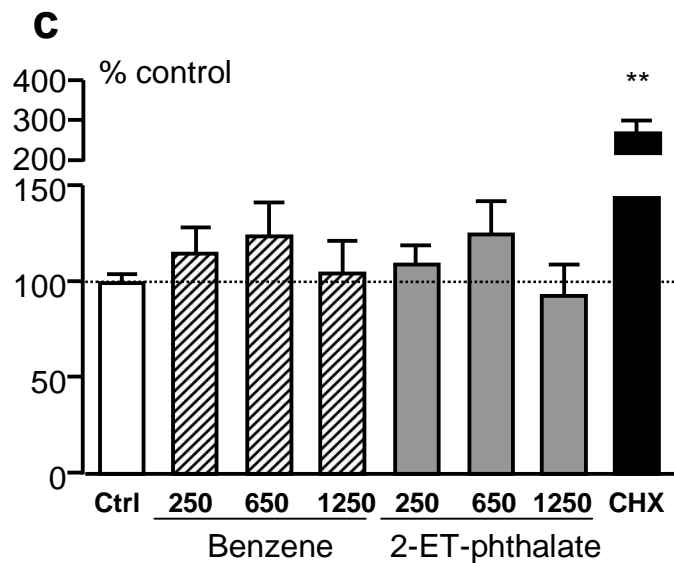

Cell energy content (**a**), viability (**B**) and apoptosis (**C**) in rat anterior pituitary primary cultures treated with 250 pM, 650 pM, 1250 pM benzene (Ben, striped bars) or bis-(2-ethylhexyl)-phthalate (2-ET, grey bars), 250 µg/ml of cycloheximide (CHX, black bar) for 3 hours. White bars represent control wells treated with plain medium (Ctrl). Data were normalized to control values and expressed as percentage of control; bars represent mean  $\pm$  SEM from 4 separate experiments.
